# Supplementary material for: A Microfluidic Experimental Method for Studying Cell-to-Cell Exosome Delivery–Taking Stem Cell–Tumor Cell Interaction as a Case
Source: Int J Mol Sci. 2023 Aug 30;24(17):13419. doi: 10.3390/ijms241713419 (PMC10488205; doi:10.3390/ijms241713419)
Supplement: Supplementary file 1 [file ijms-24-13419-s001.zip]

Archive with 9 entries (9 files):
- Figure S6 - Hi.jpg
- Figures S1 - S5.pdf
- Video S1.mp4
- Video S2 250X.mp4
- Video S3.mp4
- Video S4.mp4
- Video S5.mp4
- Video S6.mp4
- Video S7.mp4
